# Supplementary material for: Unconventional properties of nanometric FeO(111) films on Ru(0001): stoichiometry and surface structure
Source: Royal Society of Chemistry journal article supplement (doi:10.1039/c5tc03871e), 2016-01-01
Supplement: c5tc03871e1.pdf [file c5tc03871e1.pdf]

## Supporting Information

### Unconventional properties of nanometric FeO(111) films on Ru(0001): stoichiometry and surface structure

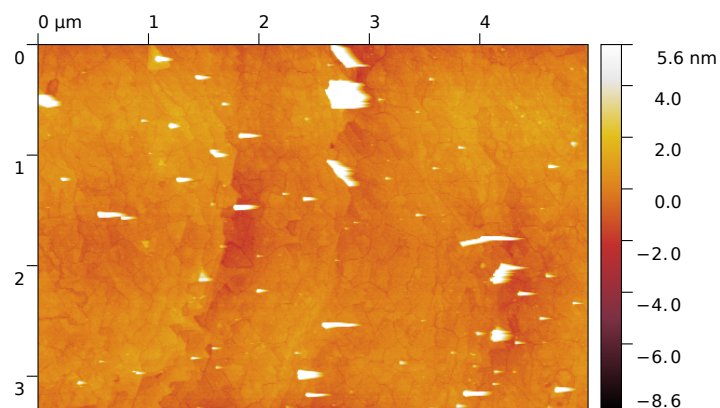

Figure S1: AFM image of a 4.7 nm thick FeO film grown on Ru(0001).

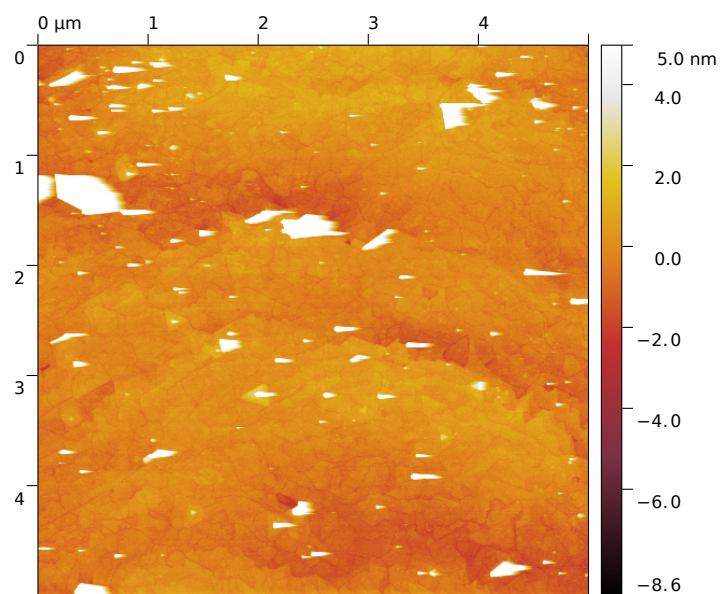

Figure S2: AFM image of a 4.7 nm thick FeO film grown on Ru(0001).
